# Supplementary material for: Conductive ionogel for the study of charge transport through SAM-based junctions in aqueous solution
Source: Royal Society of Chemistry journal article supplement (doi:10.1039/d3tc03733a), 2023-11-20
Supplement: d3tc03733a1.pdf [file d3tc03733a1.pdf]

1

***Supplementary Information***

2 Conductive Ionogel for the Study of Charge Transport through SAM-based Junctions in Aqueous  
3 Solution

4 Xiyue Bai,<sup>a</sup> Ningyue Chen,<sup>a</sup> Zhou Cao,<sup>a</sup> and Yuan Li<sup>a\*</sup>

5

6 <sup>a</sup>*Key Laboratory of Organic Optoelectronics and Molecular Engineering, Department of*  
7 *Chemistry, Tsinghua University, Beijing 100084, China*

8

\*Correspondence: yuanli\_thu@tsinghua.edu.cn

9

10 **Synthesis of 9-Mercaptoundecyic acid<sup>[1]</sup>**: Thiourea (228 mg, 3.00 mmol, 1.50 eq.) and 9-  
11 bromoundecanoic acid (500 mg, 2.00 mmol, 1.00 eq.) were added to 30 mL ethanol in a  
12 Schlenk-tube and the solution was refluxed. After 20 hours, the ethanol was removed and NaOH  
13 solution (1.5 M, 20 mL, 30.0 mmol, 15 eq.) was added, and the solution was stirred for further 20  
14 h at 90 °C under N<sub>2</sub>. For the hydrolysis, the solution was cooled in an ice bath and concentrated  
15 hydrochloric acid was added until the pH is acidic. The solution was extracted with  
16 dichloromethane three times and the solvent in the combined organic layers was removed. The  
17 crude product was recrystallized with ethanol. The product was afforded (315 mg, 1.54 mmol, 77  
18 %).  
19

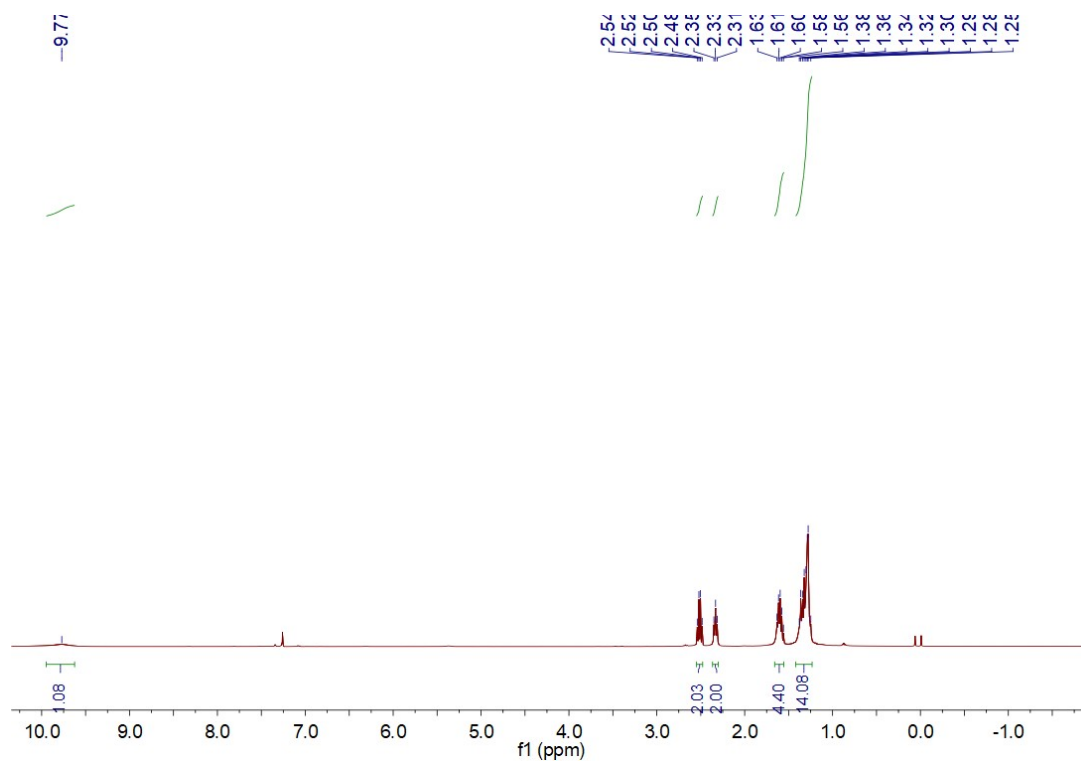

20  
21 **Figure S1.** The <sup>1</sup>H-NMR spectrum of HOOC-C<sub>9</sub>-SH.

180.45

39.01  
34.02  
33.91  
29.17  
29.05  
28.89  
28.36  
28.22  
24.53

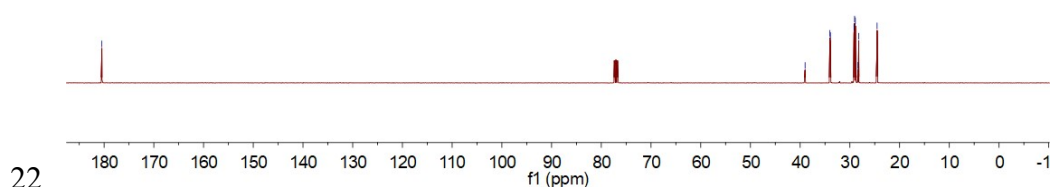

22  
23 **Figure S2.** The  $^{13}\text{C}$ -NMR spectrum of HOOC-C<sub>9</sub>-SH.

24  $^1\text{H}$  NMR (400 MHz, CDCl<sub>3</sub>)  $\delta$  9.77 (s, 1H), 2.51 (dd, J = 14.7, 7.4 Hz, 2H), 2.33 (t, J = 7.5 Hz,  
25 2H), 1.70 – 1.49 (m, 4H), 1.43 – 1.22 (m, 11H).

26  $^{13}\text{C}$  NMR (100 MHz, CDCl<sub>3</sub>)  $\delta$  180.45, 39.01, 34.02, 33.91, 29.17, 29.05, 28.89, 28.36, 28.22,  
27 24.53.

28 HRMS (APCI+): m/z calc for C<sub>10</sub>H<sub>20</sub>O<sub>2</sub>S [M-H]<sup>+</sup> 203.1106, found 203.113.

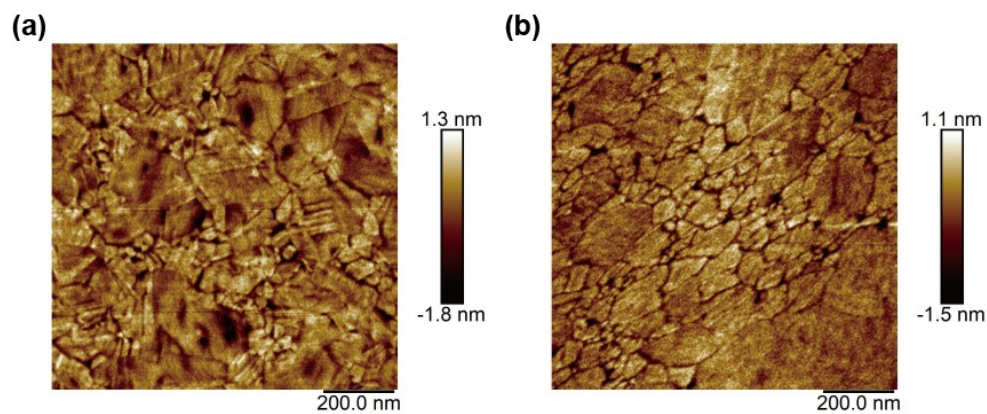

29  
30 **Figure S3.** (a) The AFM images of template stripped Au (b) The AFM images of template stripped  
31 Ag.

32 The Atomic Force Microscope (AFM) images were measured by Bruker Dimension Icon  
33 AFM with peak force tapping mode (ScanAsyst-Air, resonant frequency: 70 KHz, spring constant:  
34 0.4 N/m). The AFM software (NanoScope Analysis) was used to analyze the AFM images for  
35 topography and roughness.

36

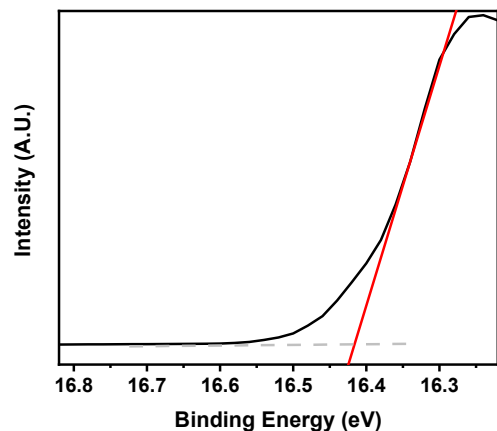

37

38 **Figure S4.** Secondary electron cut-off spectra of IG-CB recorded using the UPS technique.

39

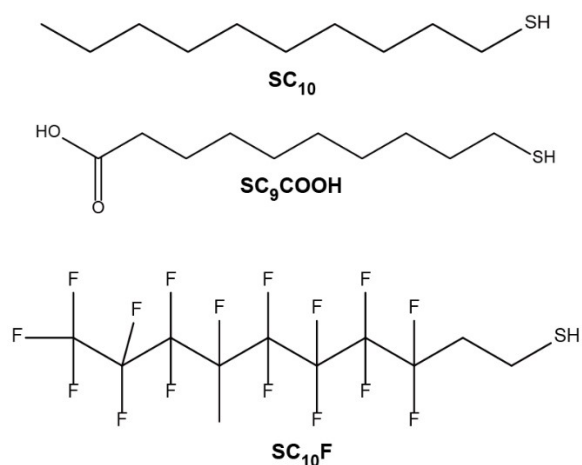

40

41 **Figure S5.** The structure of three molecules.

42

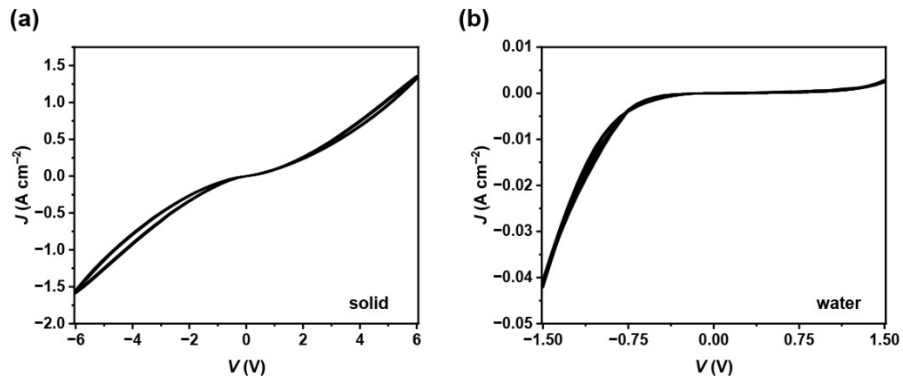

43  
44 **Figure S6.** The limitation voltage of IG-CB electrode.

45

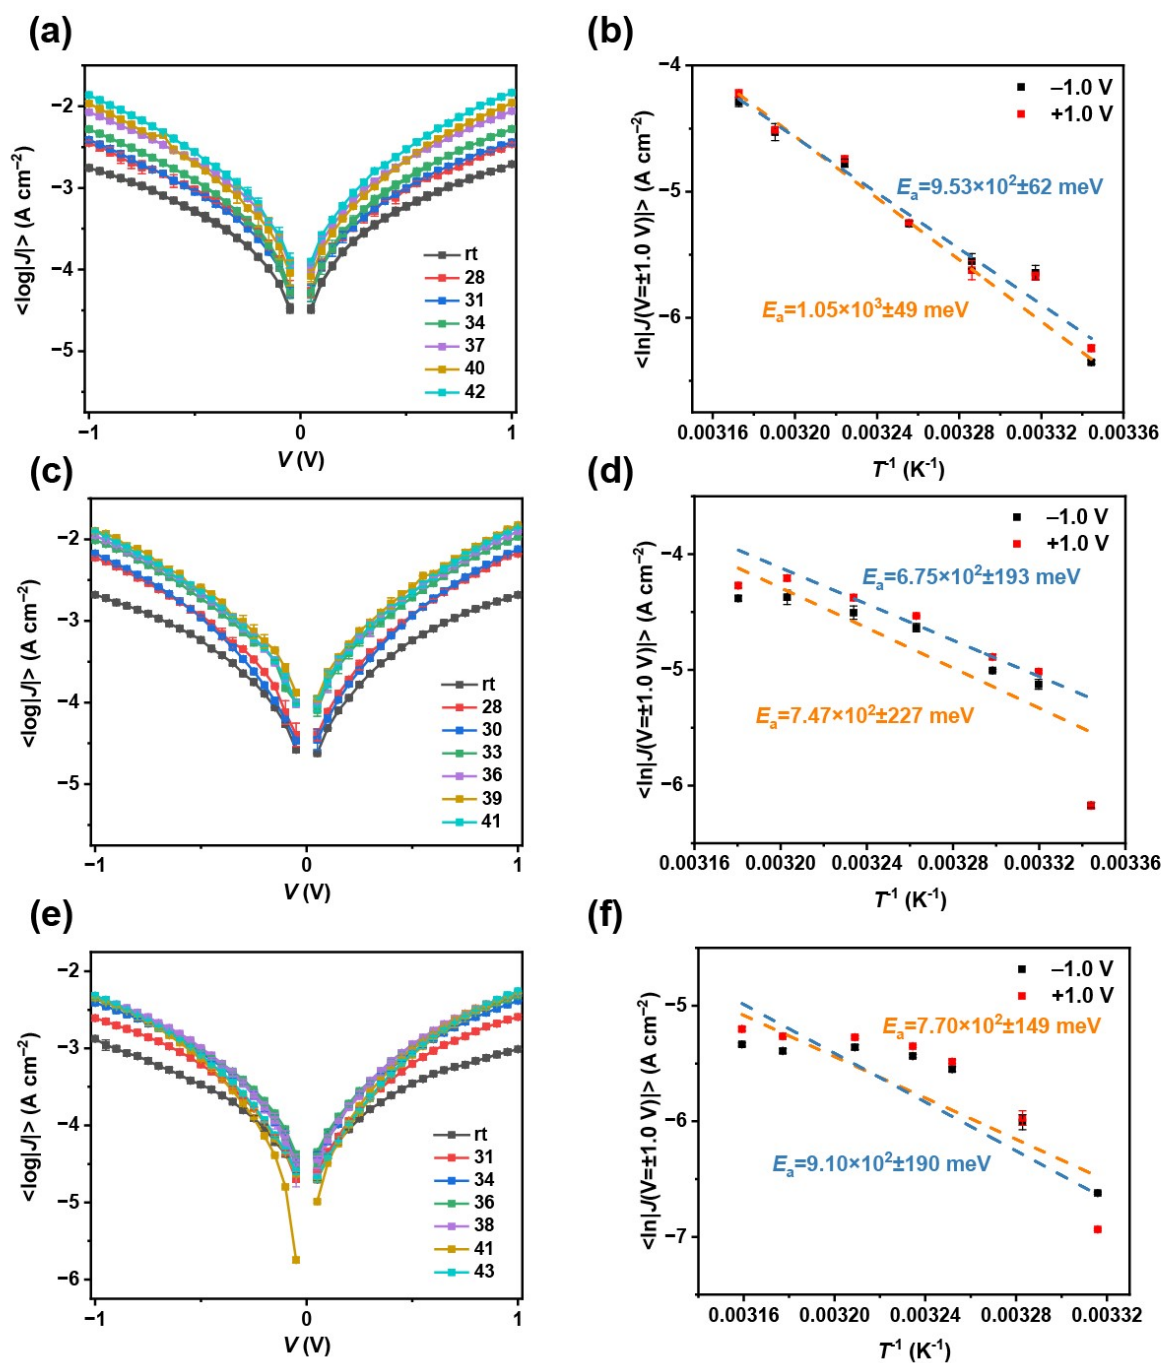

46

47 **Figure S7.** The repeatability of  $T$ -dependent experiment in -COOH//Mb junctions.

48

49 [1] D. J. Yoo, K.-S. Lee, A. R. Kim, K. S. Nahm, *Korean Chem. Eng. Res.* **2010**, *49*, 330.

50
